# Supplementary material for: Evaluating PCR-Based Detection of Salmonella Typhi and Paratyphi A in the Environment as an Enteric Fever Surveillance Tool
Source: PubMed Central journal article supplement (PMC6335896; doi:10.4269/ajtmh.18-0428), 2018-11-12
Supplement: tpmd180428.SD1.pdf [file tpmd180428.SD1.pdf]

**Supplementary Table S1.** Characteristics of water samples collected from Dhaka and Mirzapur in Bangladesh.

| Sample Number | Water collection date | Ct, <i>Salmonella</i> Typhi | Ct, <i>Salmonella</i> Paratyphi A | Water source  |
|---------------|-----------------------|-----------------------------|-----------------------------------|---------------|
| Dhaka-01      | 08-Mar-16             | 32.82099152                 | Not detected                      | Deep Tubewell |
| Dhaka-02      | 08-Mar-16             | Not detected                | 36.53629684                       | Reserve Tank  |
| Dhaka-03      | 08-Mar-16             | 35.67969131                 | Not detected                      | Direct Tap    |
| Dhaka-04      | 10-Mar-16             | Not detected                | Not detected                      | Direct Tap    |
| Dhaka-05      | 14-Mar-16             | 23.48597908                 | 35.00601196                       | Reserve Tank  |
| Dhaka-06      | 15-Mar-16             | 23.48128891                 | 35.56411743                       | Direct Tap    |
| Dhaka-07      | 15-Mar-16             | 21.54895973                 | 35.60522079                       | Reserve Tank  |
| Dhaka-08      | 15-Mar-16             | Not detected                | Not detected                      | Direct Tap    |
| Dhaka-09      | 19-Mar-16             | 28.12397385                 | 36.8869133                        | Direct Tap    |
| Dhaka-10      | 19-Mar-16             | 33.30073929                 | Not detected                      | Reserve Tank  |
| Dhaka-11      | 19-Mar-16             | 27.40325928                 | 36.82773972                       | Direct Tap    |
| Dhaka-12      | 20-Mar-16             | 33.44520187                 | 36.70759583                       | Direct Tap    |
| Dhaka-13      | 21-Mar-16             | Not detected                | Not detected                      | Direct Tap    |
| Dhaka-14      | 21-Mar-16             | 34.72368622                 | Not detected                      | Reserve Tank  |
| Dhaka-15      | 22-Mar-16             | 33.04956818                 | Not detected                      | Reserve Tank  |
| Dhaka-16      | 27-Mar-16             | 34.98424911                 | Not detected                      | Reserve Tank  |
| Dhaka-17      | 22-Mar-16             | Not detected                | 35.61887741                       | Direct Tap    |
| Dhaka-18      | 27-Mar-16             | 34.03388977                 | Not detected                      | Direct Tap    |
| Dhaka-19      | 27-Mar-16             | Not detected                | Not detected                      | Reserve Tank  |
| Dhaka-20      | 29-Mar-16             | 35.76179123                 | Not detected                      | Reserve Tank  |
| Dhaka-21      | 30-Mar-16             | Not detected                | Not detected                      | Reserve Tank  |
| Dhaka-22      | 30-Mar-16             | Not detected                | Not detected                      | Direct Tap    |
| Dhaka-23      | 31-Mar-16             | 31.16184616                 | 36.25772095                       | Direct Tap    |
| Dhaka-24      | 02-Apr-16             | 31.4448204                  | 34.38116837                       | Direct Tap    |
| Dhaka-25      | 02-Apr-16             | 33.4496994                  | 36.8572998                        | Direct Tap    |
| Dhaka-26      | 10-Apr-16             | Not detected                | Not detected                      | Reserve Tank  |
| Dhaka-27      | 06-Apr-16             | 33.94907761                 | Not detected                      | Reserve Tank  |
| Dhaka-28      | 09-Apr-16             | 34.7339592                  | Not detected                      | Reserve Tank  |
| Dhaka-29      | 10-Apr-16             | Not detected                | Not detected                      | Direct Tap    |
| Dhaka-30      | 17-Apr-16             | Not detected                | 37.2097168                        | Reserve Tank  |
| Dhaka-31      | 16-Apr-16             | Not detected                | Not detected                      | Reserve Tank  |
| Dhaka-32      | 23-Apr-16             | 34.54298401                 | Not detected                      | Reserve Tank  |
| Dhaka-33      | 01-Jun-16             | 38.96130371                 | Not detected                      | Reserve Tank  |

|             |           |              |              |               |
|-------------|-----------|--------------|--------------|---------------|
| Dhaka-34    | 07-May-16 | 34.55870438  | Not detected | Reserve Tank  |
| Dhaka-35    | 07-May-16 | Not detected | Not detected | Reserve Tank  |
| Dhaka-36    | 16-May-16 | Not detected | Not detected | Reserve Tank  |
| Dhaka-37    | 17-May-16 | 34.95342255  | Not detected | Reserve Tank  |
| Dhaka-38    | 25-May-16 | 36.81695938  | Not detected | Reserve Tank  |
| Dhaka-39    | 25-May-16 | Not detected | Not detected | Reserve Tank  |
| Dhaka-40    | 12-Jul-16 | 38.86722946  | Not detected | Reserve Tank  |
| Dhaka-41    | 16-May-16 | Not detected | Not detected | Reserve Tank  |
| Dhaka-42    | 22-May-16 | 34.06170273  | 36.68687439  | Reserve Tank  |
| Dhaka-43    | 01-Jun-16 | Not detected | Not detected | Reserve Tank  |
| Dhaka-44    | 31-May-16 | Not detected | Not detected | Reserve Tank  |
| Dhaka-45    | 29-May-16 | Not detected | Not detected | Reserve Tank  |
| Dhaka-46    | 31-May-16 | Not detected | Not detected | Direct Tap    |
| Dhaka-47    | 14-Jun-16 | 35.73158264  | Not detected | Reserve Tank  |
| Dhaka-48    | 29-May-16 | Not detected | Not detected | Reserve Tank  |
| Dhaka-49    | 01-Jun-16 | 35.91573334  | Not detected | Reserve Tank  |
| Dhaka-50    | 29-May-16 | 34.36089325  | Not detected | Reserve Tank  |
| Dhaka-51    | 12-Jul-16 | 34.39375687  | 34.68935394  | Reserve Tank  |
| Dhaka-52    | 02-Jun-16 | Not detected | Not detected | Reserve Tank  |
| Dhaka-53    | 02-Jun-16 | 37.04704285  | Not detected | Direct Tap    |
| Dhaka-54    | 02-Jun-16 | Not detected | Not detected | Reserve Tank  |
| Dhaka-55    | 19-Jun-16 | 36.34250259  | Not detected | Reserve Tank  |
| Dhaka-56    | 14-Jun-16 | 33.59719849  | Not detected | Direct Tap    |
| Dhaka-57    | 19-Jun-16 | 33.66790771  | Not detected | Reserve Tank  |
| Dhaka-58    | 16-Jun-16 | 34.43291855  | Not detected | Reserve Tank  |
| Dhaka-59    | 16-Jun-16 | 33.50614548  | Not detected | Reserve Tank  |
| Mirzapur-01 | 01-Jun-17 | Not detected | Not detected | Deep Tubewell |
| Mirzapur-02 | 01-Jun-17 | Not detected | Not detected | Deep Tubewell |
| Mirzapur-03 | 01-Jun-17 | Not detected | Not detected | Deep Tubewell |
| Mirzapur-04 | 01-Jun-17 | Not detected | Not detected | Deep Tubewell |
| Mirzapur-05 | 01-Jun-17 | Not detected | Not detected | Deep Tubewell |
| Mirzapur-06 | 01-Jun-17 | Not detected | Not detected | Deep Tubewell |
| Mirzapur-07 | 01-Jun-17 | Not detected | Not detected | Deep Tubewell |
| Mirzapur-08 | 01-Jun-17 | Not detected | Not detected | Deep Tubewell |
| Mirzapur-09 | 01-Jun-17 | Not detected | Not detected | Deep Tubewell |
| Mirzapur-10 | 01-Jun-17 | Not detected | Not detected | Deep Tubewell |
| Mirzapur-11 | 03-Jun-17 | Not detected | Not detected | Deep Tubewell |
| Mirzapur-12 | 03-Jun-17 | Not detected | Not detected | Deep Tubewell |
| Mirzapur-13 | 03-Jun-17 | Not detected | Not detected | Deep Tubewell |

|             |           |              |              |               |
|-------------|-----------|--------------|--------------|---------------|
| Mirzapur-14 | 03-Jun-17 | Not detected | Not detected | Deep Tubewell |
| Mirzapur-15 | 03-Jun-17 | Not detected | Not detected | Deep Tubewell |
| Mirzapur-16 | 04-Jun-17 | Not detected | Not detected | Deep Tubewell |
| Mirzapur-17 | 04-Jun-17 | Not detected | Not detected | Deep Tubewell |
| Mirzapur-18 | 04-Jun-17 | Not detected | Not detected | Deep Tubewell |
| Mirzapur-19 | 04-Jun-17 | Not detected | Not detected | Deep Tubewell |
| Mirzapur-20 | 04-Jun-17 | Not detected | Not detected | Deep Tubewell |
| Mirzapur-21 | 04-Jun-17 | Not detected | Not detected | Deep Tubewell |
| Mirzapur-22 | 04-Jun-17 | Not detected | Not detected | Deep Tubewell |
| Mirzapur-23 | 04-Jun-17 | Not detected | Not detected | Deep Tubewell |
| Mirzapur-24 | 05-Jun-17 | Not detected | Not detected | Deep Tubewell |
| Mirzapur-25 | 05-Jun-17 | Not detected | Not detected | Deep Tubewell |
| Mirzapur-26 | 05-Jun-17 | Not detected | Not detected | Deep Tubewell |
| Mirzapur-27 | 05-Jun-17 | Not detected | Not detected | Deep Tubewell |
| Mirzapur-28 | 05-Jun-17 | Not detected | Not detected | Deep Tubewell |
| Mirzapur-29 | 05-Jun-17 | Not detected | Not detected | Deep Tubewell |
| Mirzapur-30 | 05-Jun-17 | Not detected | Not detected | Deep Tubewell |
| Mirzapur-31 | 11-Jun-17 | Not detected | Not detected | Deep Tubewell |
| Mirzapur-32 | 11-Jun-17 | Not detected | Not detected | Pond          |
| Mirzapur-33 | 11-Jun-17 | Not detected | Not detected | Reserve Tank  |
